# Supplementary material
Source: PubMed Central journal article supplement (PMC6989349)
Supplement: NIHMS1058811-supplement-Supplemental.pdf [file NIHMS1058811-supplement-Supplemental.pdf]

MANUSCRIPT # 2019-216102 /supplemental tables

**COMPARATIVE RISK OF SERIOUS INFECTIONS AMONG REAL-WORLD USERS OF BIOLOGICS FOR PSORIASIS OR PSORIATIC ARTHRITIS**

Short running title: Biologics-associated serious infections in PsO and PsA

Xintong Li, BS<sup>1,2</sup>  
Kathleen M. Andersen, MSc<sup>1,2</sup>  
Hsien-Yen Chang, PhD<sup>1,3</sup>  
Jeffrey R. Curtis, MD MS MPH<sup>4,5</sup>  
G. Caleb Alexander, MD, MS, FACP<sup>1,2,3,6</sup>

1. Center for Drug Safety and Effectiveness, Johns Hopkins Bloomberg School of Public Health, Baltimore, MD 21205
2. Department of Epidemiology, Johns Hopkins Bloomberg School of Public Health, Baltimore, MD 21205
3. Department of Health Policy and Management, Johns Hopkins Bloomberg School of Public Health, Baltimore, MD 21205
4. Division of Clinical Immunology and Rheumatology, University of Alabama at Birmingham, Birmingham AL
5. Department of Epidemiology, University of Alabama at Birmingham, Birmingham AL
6. Division of General Internal Medicine, Johns Hopkins Medicine, Baltimore, MD 21287

**Correspondence**

G. Caleb Alexander, MD, MS  
Johns Hopkins Bloomberg School of Public Health  
Department of Epidemiology  
615 N. Wolfe Street W6035  
Baltimore, MD 21205  
Phone: 410 955 8168; Fax: 410 955 0863  
Email: galexan9@jhmi.edu

MANUSCRIPT # 2019-216102 /supplemental tables

## **SUPPLEMENTAL TABLES**

**Table S1.** National Drug Code (NDC), to define outpatient pharmacy dispensation claims, and Healthcare Common Procedure Coding System (HCPCS) codes, to define in-patient infusion.

**Table S2.** Phototherapy, disease-modifying antirheumatic drug (DMARD) and nonsteroidal anti-inflammatory drug (NSAID) codes for covariate definition.

**Table S3.** Additional characteristics of psoriasis or psoriatic arthritis patients at the time of index date, overall and by drug class.

**Table S4.** Additional characteristics of psoriasis patients at the time of index date, overall and by drug class.

**Table S5.** Additional characteristics of psoriasis patients at the time of index date, overall and by drug class.

**Table S6.** Hazard ratios (95% confidence intervals), from sensitivity analysis to restrict to serious infections listed as primary diagnosis on hospital admissions claims.

**Table S7.** Hazard ratios (95% confidence intervals), from sensitivity analysis to narrow permissible prescription gap to 60 days.

MANUSCRIPT # 2019-216102 /supplemental tables

**Table S1.** National Drug Code (NDC), to define outpatient pharmacy dispensation claims, and Healthcare Common Procedure Coding System (HCPCS) codes, to define in-patient infusion.

| <b>Class</b> | <b>Biologic</b>    | <b>NDC code</b> | <b>HCPCS code</b> |
|--------------|--------------------|-----------------|-------------------|
| IL-17        | Ixekizumab         | 0002-1445       | N/A               |
|              |                    | 0002-7724       |                   |
| IL-17        | Secukinumab        | 0078-0639       |                   |
| IL-12/23     | Ustekinumab        | 57894-054       | J3357             |
|              |                    | 57894-060       | J3358             |
|              |                    | 57894-061       | C9487             |
|              |                    |                 | C9261             |
|              |                    |                 | C9989             |
| TNF          | Adalimumab         | 0074-0067       | J0135             |
|              |                    | 0074-0124       |                   |
|              |                    | 0074-0243       |                   |
|              |                    | 0074-0554       |                   |
|              |                    | 0074-0616       |                   |
|              |                    | 0074-0817       |                   |
|              |                    | 0074-1539       |                   |
|              |                    | 0074-2540       |                   |
|              |                    | 0074-3799       |                   |
|              |                    | 0074-4339       |                   |
|              |                    | 0074-6347       |                   |
|              |                    | 0074-9374       |                   |
|              |                    | 50090-3530      |                   |
| TNF          | Certolizumab pegol | 50474-700       | J0717             |
|              |                    | 50474-710       |                   |
| TNF          | Etanercept         | 50090-3531      | J1438             |
|              |                    | 58406-425       |                   |
|              |                    | 58406-435       |                   |
|              |                    | 58406-445       |                   |
|              |                    | 58406-446       |                   |
|              |                    | 58406-455       |                   |
|              |                    | 58406-456       |                   |
| TNF          | Golimumab          | 57894-070       | J1602             |
|              |                    | 57894-071       |                   |
| TNF          | Infliximab         | 57894-030       | J1745             |
|              |                    | 0069-0809       |                   |
|              |                    | 0006-4305       |                   |

MANUSCRIPT # 2019-216102 /supplemental tables

**Table S2.** Phototherapy, disease-modifying antirheumatic drug (DMARD) and nonsteroidal anti-inflammatory drug (NSAID) codes for covariate definition.

| <b>Therapy</b> | <b>Description</b>                                                                                                                                                                                                        | <b>Code type</b> | <b>Code</b> |
|----------------|---------------------------------------------------------------------------------------------------------------------------------------------------------------------------------------------------------------------------|------------------|-------------|
| Phototherapy   | Photochemotherapy; psoralens and ultraviolet A (PUVA)                                                                                                                                                                     | CPT              | 96912       |
| Phototherapy   | Photochemotherapy (Goeckerman and/or PUVA) for severe photoresponsive dermatoses requiring at least 4-hyphen8 hours of care under direct supervision of the physician (includes applications of medication and dressings) | CPT              | 96913       |
| Phototherapy   | Actinotherapy (ultraviolet light)                                                                                                                                                                                         | CPT              | 96900       |
| Phototherapy   | Photochemotherapy; tar and ultraviolet B (Goeckerman treatment) or petrolatum and ultraviolet B                                                                                                                           | CPT              | 96910       |
| Phototherapy   | Ultraviolet light therapy system panel, includes bulbs/lamps, timer and eye protection; treatment area 2 sq feet or less                                                                                                  | CPT              | E0691       |
| Phototherapy   | Ultraviolet light therapy system panel, includes bulbs/lamps, timer and eye protection; 4 ft panel                                                                                                                        | CPT              | E0692       |
| Phototherapy   | Ultraviolet light therapy system panel, includes bulbs/lamps, timer and eye protection; 6 ft panel                                                                                                                        | CPT              | E0693       |
| Phototherapy   | Ultraviolet multidirectional light therapy system in 6 ft cabinet, includes bulbs/lamps, timer and eye protection                                                                                                         | CPT              | E0694       |
| DMARD          | Methotrexate                                                                                                                                                                                                              | NDC              |             |
| DMARD          | Sulfasalazine                                                                                                                                                                                                             | NDC              |             |
| DMARD          | Leflunomide                                                                                                                                                                                                               | NDC              |             |
| DMARD          | Cyclosporine                                                                                                                                                                                                              | NDC              |             |
| DMARD          | Apremilast                                                                                                                                                                                                                | NDC              |             |
| DMARD          | Azathioprine                                                                                                                                                                                                              | NDC              |             |
| DMARD          | Retinoids                                                                                                                                                                                                                 | NDC              |             |
| NSAID          | Celecoxib                                                                                                                                                                                                                 | NDC              |             |
| NSAID          | Diclofenac                                                                                                                                                                                                                | NDC              |             |
| NSAID          | Salicylates                                                                                                                                                                                                               | NDC              |             |
| NSAID          | Etodolac                                                                                                                                                                                                                  | NDC              |             |
| NSAID          | Fenoprofen                                                                                                                                                                                                                | NDC              |             |
| NSAID          | Flurbiprofen                                                                                                                                                                                                              | NDC              |             |
| NSAID          | Ibuprofen                                                                                                                                                                                                                 | NDC              |             |
| NSAID          | Indomethacin                                                                                                                                                                                                              | NDC              |             |
| NSAID          | Ketoprofen                                                                                                                                                                                                                | NDC              |             |
| NSAID          | Ketorolac tromethamine                                                                                                                                                                                                    | NDC              |             |
| NSAID          | Meclofenamate sodium                                                                                                                                                                                                      | NDC              |             |
| NSAID          | Mefenamic acid                                                                                                                                                                                                            | NDC              |             |
| NSAID          | Meloxicam                                                                                                                                                                                                                 | NDC              |             |
| NSAID          | Nabumetone                                                                                                                                                                                                                | NDC              |             |
| NSAID          | Naproxen sodium                                                                                                                                                                                                           | NDC              |             |

MANUSCRIPT # 2019-216102 /supplemental tables

---

|               |                    |     |
|---------------|--------------------|-----|
| NSAID         | Oxaprozin          | NDC |
| NSAID         | Piroxicam          | NDC |
| NSAID         | Sulindac           | NDC |
| NSAID         | Tolmetin           | NDC |
| <hr/>         |                    |     |
| Oral steroids | Prednisolone       | NDC |
| Oral steroids | Betamethasone      | NDC |
| Oral steroids | Dexamethasone      | NDC |
| Oral steroids | Hydrocortisone     | NDC |
| Oral steroids | Methylprednisolone | NDC |
| Oral steroids | Deflazacort        | NDC |

---

Phototherapy history was defined using Current Procedural Terminology (CPT) codes. Medications used during the lookback period were identified in pharmacy dispensation claims using National Drug Codes (NDC).

MANUSCRIPT # 2019-216102 /supplemental tables

**Table S3.** Additional characteristics of psoriasis or psoriatic arthritis patients at the time of index date, overall and by drug class.

|                                  | All<br>(n=11,560) | IL-17<br>(n = 2,148) | IL-12/23<br>(n = 2,882) | TNF<br>(n = 6,530) |
|----------------------------------|-------------------|----------------------|-------------------------|--------------------|
| Geographic area                  |                   |                      |                         |                    |
| Metropolitan                     | 10,393 (90%)      | 1,968 (92%)          | 2,619 (91%)             | 5,806 (89%)        |
| Micropolitan                     | 650 (6%)          | 93 (4%)              | 147 (5%)                | 410 (6%)           |
| Small town core &<br>rural       | 517 (5%)          | 87 (4%)              | 116 (4%)                | 314 (5%)           |
| Health plan                      |                   |                      |                         |                    |
| Exclusive Provider               |                   |                      |                         |                    |
| Organization                     | 1,297 (11%)       | 230 (11%)            | 349 (12%)               | 718 (11%)          |
| HMO                              | 974 (8%)          | 194 (9%)             | 207 (7%)                | 573 (9%)           |
| Other                            | 189 (2%)          | 34 (2%)              | 31 (1%)                 | 124 (2%)           |
| Point-of-Service                 | 9,100 (79%)       | 1,690 (79%)          | 2,295 (80%)             | 5,115 (78%)        |
| Race                             |                   |                      |                         |                    |
| Asian                            | 456 (4%)          | 92 (4%)              | 128 (4%)                | 236 (4%)           |
| Black                            | 728 (6%)          | 132 (6%)             | 154 (5%)                | 442 (7%)           |
| Hispanic                         | 1,215 (11%)       | 236 (11%)            | 326 (11%)               | 653 (10%)          |
| White                            | 9,161 (79%)       | 1,688 (79%)          | 2,274 (79%)             | 5,199 (80%)        |
| Education level                  |                   |                      |                         |                    |
| Up to high school                | 2,633 (23%)       | 486 (23%)            | 640 (22%)               | 1,507 (23%)        |
| Bachelor's degree                | 6,464 (56%)       | 1,189 (55%)          | 1,570 (55%)             | 3,705 (57%)        |
| Graduate training                | 2,463 (21%)       | 473 (22%)            | 672 (23%)               | 1,318 (20%)        |
| Diagnosis in lookback<br>period  |                   |                      |                         |                    |
| Ankylosing<br>spondylitis        | 215 (2%)          | 34 (2%)              | 20 (1%)                 | 161 (3%)           |
| Chronic pulmonary<br>disease     | 823 (7%)          | 151 (7%)             | 175 (6%)                | 497 (8%)           |
| Peripheral vascular<br>disorders | 136 (1%)          | 27 (1%)              | 37 (1%)                 | 72 (1%)            |
| Cardiac arrhythmias              | 379 (3%)          | 72 (3%)              | 87 (3%)                 | 220 (3%)           |
| Congestive heart<br>failure      | 102 (1%)          | 20 (1%)              | 26 (1%)                 | 56 (1%)            |
| Depression                       | 1,277 (11%)       | 240 (11%)            | 280 (10%)               | 757 (2%)           |
| Diabetes,<br>uncomplicated       | 1,175 (10%)       | 277 (13%)            | 261 (9%)                | 637 (10%)          |
| Diabetes,<br>complicated         | 585 (5%)          | 153 (7%)             | 136 (5%)                | 296 (5%)           |
| Hypertension                     | 2858 (25%)        | 605 (28%)            | 640 (22%)               | 1613 (25%)         |
| Liver disease                    | 438 (4%)          | 89 (4%)              | 114 (4%)                | 235 (4%)           |
| Obesity                          | 1229 (11%)        | 257 (12%)            | 262 (9%)                | 710 (11%)          |
| Renal failure                    | 146 (1%)          | 31 (1%)              | 31 (1%)                 | 84 (1%)            |
| Emergency room visits            |                   |                      |                         |                    |
| 0                                | 10,212 (88%)      | 1,895 (88%)          | 2,573 (89%)             | 5,744 (88%)        |
| 1                                | 998 (9%)          | 199 (9%)             | 241 (8%)                | 558 (9%)           |
| 2 or more                        | 350 (3%)          | 54 (3%)              | 68 (2%)                 | 228 (4%)           |

MANUSCRIPT # 2019-216102 /supplemental tables

|                          |          |         |         |          |
|--------------------------|----------|---------|---------|----------|
| Hospitalized             | 315 (3%) | 45 (2%) | 63 (2%) | 209 (3%) |
| Physician office visits  | 5 (3)    | 5 (3)   | 4 (3)   | 5 (3)    |
| Specialist office visits | 2 (1)    | 2 (1)   | 2 (2)   | 2 (1)    |

Continuous variables are presented as mean (standard deviation), and categorical variables are presented as counts (percentages).

MANUSCRIPT # 2019-216102 /supplemental tables

**Table S4.** Additional characteristics of psoriasis patients at the time of index date, overall and by drug class.

| <b>Variable</b>                        | <b>Overall<br/>(n=9692)</b> | <b>IL-17<br/>(n = 1903)</b> | <b>IL-12/23<br/>(n = 2644)</b> | <b>TNF<br/>(n = 5145)</b> |
|----------------------------------------|-----------------------------|-----------------------------|--------------------------------|---------------------------|
| Age                                    | 46.09 (12)                  | 48.02 (11)                  | 45.59 (12)                     | 45.64 (12)                |
| Male                                   | 5,286 (54%)                 | 1046 (55%)                  | 1465 (55%)                     | 2775 (54%)                |
| Geographic area                        |                             |                             |                                |                           |
| Metropolitan area                      | 8761 (90)                   | 1749 (92%)                  | 2405 (91%)                     | 4607 (90%)                |
| Micropolitan area<br>core              | 510(5%)                     | 78(4%)                      | 132(5%)                        | 300(6%)                   |
| Small town core                        | 269(3%)                     | 54(3%)                      | 66(3%)                         | 149(3%)                   |
| Rural areas                            | 152(2%)                     | 22(1%)                      | 41(2%)                         | 89(2%)                    |
| Health plan                            |                             |                             |                                |                           |
| Exclusive                              |                             |                             |                                |                           |
| Provider                               | 1044(11%)                   | 195(10%)                    | 308(12%)                       | 541(10%)                  |
| Organization                           |                             |                             |                                |                           |
| HMO                                    | 773(8%)                     | 165(9%)                     | 185(7%)                        | 423(8%)                   |
| Other                                  | 162(1%)                     | 30(2%)                      | 28(1%)                         | 104(2%)                   |
| Point-of-<br>Service                   | 7713(80%)                   | 1513(80%)                   | 2123(80%)                      | 4077(79%)                 |
| Race                                   |                             |                             |                                |                           |
| Asian                                  | 405(4%)                     | 86(4%)                      | 122(5%)                        | 197(4%)                   |
| Black                                  | 610(6%)                     | 116(6%)                     | 139(5%)                        | 355(7%)                   |
| Hispanic                               | 1045(11%)                   | 206(11%)                    | 302(11%)                       | 537(10%)                  |
| White                                  | 7632(79%)                   | 1495(79%)                   | 2081(79%)                      | 4056(79%)                 |
| Education level                        |                             |                             |                                |                           |
| Bachelor Degree<br>Plus                | 2129(22%)                   | 438(23%)                    | 626(24%)                       | 1065(21%)                 |
| high school or<br>lower                | 2227(23%)                   | 435(23%)                    | 596(22%)                       | 1196(23%)                 |
| less than<br>bachelor                  | 5336(55%)                   | 1030(54%)                   | 1422(54%)                      | 2884(56%)                 |
| Household<br>Income                    |                             |                             |                                |                           |
| <\$40,000                              | 1155(12%)                   | 245(13%)                    | 309(12%)                       | 601(12%)                  |
| \$40,000-\$74,999                      | 2334(24%)                   | 411(22%)                    | 615(23%)                       | 1308(25%)                 |
| \$75,000-<br>\$124,999                 | 3080(32%)                   | 598(31%)                    | 855(32%)                       | 1627(32%)                 |
| \$125,000-<br>\$199,999                | 1821(19%)                   | 376(20%)                    | 493(19%)                       | 952(19%)                  |
| \$200,000+                             | 1302(13%)                   | 273(14%)                    | 372(14%)                       | 657(13%)                  |
| Diagnosis                              |                             |                             |                                |                           |
| Psoriatic arthritis                    | 3648 (38%)                  | 699 (37%)                   | 650 (25%)                      | 2299 (45%)                |
| Charlson<br>Comorbidity<br>Index score |                             |                             |                                |                           |
| 0                                      | 7011(72%)                   | 1276(67%)                   | 1998(76%)                      | 3737(73%)                 |

MANUSCRIPT # 2019-216102 /supplemental tables

|                                           |            |            |            |            |
|-------------------------------------------|------------|------------|------------|------------|
| 1                                         | 1788(18%)  | 423(22%)   | 422(16%)   | 943(18%)   |
| >=2                                       | 893(9%)    | 204(11%)   | 224(9%)    | 465(9%)    |
| <hr/>                                     |            |            |            |            |
| Diagnosis in<br>lookback period           |            |            |            |            |
| Ankylosing<br>spondylitis                 | 130(1%)    | 24(1%)     | 13(1%)     | 93(2%)     |
| Chronic<br>pulmonary<br>disease           | 658(7%)    | 133(7%)    | 152(6%)    | 373(7%)    |
| Peripheral<br>vascular<br>disorders       | 106(1%)    | 24(1%)     | 34(1%)     | 48(1%)     |
| Cardiac<br>arrhythmia<br>s                | 306(3%)    | 61(3%)     | 78(3%)     | 167(3%)    |
| Congestive heart<br>failure               | 82(1%)     | 17(1%)     | 23(1%)     | 42(1%)     |
| Depression                                | 1050(11%)  | 206(11%)   | 257(10%)   | 587(11%)   |
| Diabetes                                  | 966(10%)   | 242(13%)   | 232(9%)    | 492(10%)   |
| Diabetes,<br>complicate<br>d              | 479(5%)    | 132(7%)    | 114(4%)    | 233(5%)    |
| Hypertension                              | 2334(24%)  | 525(28%)   | 576(22%)   | 1233(24%)  |
| Liver disease                             | 363(4%)    | 77(4%)     | 106(4%)    | 180(4%)    |
| Obesity                                   | 975(10%)   | 217(11%)   | 220(8%)    | 538(11%)   |
| Renal failure                             | 125(1%)    | 26(1%)     | 29(1%)     | 70(1%)     |
| <hr/>                                     |            |            |            |            |
| Emergency room<br>visits                  |            |            |            |            |
| 0                                         | 8610 (89%) | 1685 (89%) | 2373 (90%) | 4552 (89%) |
| 1                                         | 801 (8%)   | 173 (9%)   | 215 (8%)   | 413 (8%)   |
| >=2                                       | 281 (3%)   | 45 (2%)    | 56 (2%)    | 180 (4%)   |
| <hr/>                                     |            |            |            |            |
| Hospitalized                              | 262 (2%)   | 42 (2%)    | 52 (2%)    | 159 (3%)   |
| <hr/>                                     |            |            |            |            |
| Physician office<br>visits                |            |            |            |            |
|                                           | 4(3)       | 5(3)       | 4(3)       | 4 (3)      |
| <hr/>                                     |            |            |            |            |
| Specialists<br>physician office<br>visits |            |            |            |            |
|                                           | 2(1)       | 2(1)       | 2 (2)      | 2(1)       |
| <hr/>                                     |            |            |            |            |
| Number of<br>previous<br>biologics        |            |            |            |            |
| 0                                         | 4918(51%)  | 275(15%)   | 1235(47%)  | 3408(66%)  |
| 1                                         | 3051(32%)  | 705(37%)   | 1022(39%)  | 1324(26%)  |
| >=2                                       | 1723(18%)  | 923(49%)   | 387(15%)   | 413(8%)    |
| <hr/>                                     |            |            |            |            |
| DMARDs in past<br>6 mos                   |            |            |            |            |
| Methotrexate                              | 1524(16%)  | 202(11%)   | 293(11%)   | 1029(20%)  |
| Apremilast                                | 694(7%)    | 200(11%)   | 217(8%)    | 277(5%)    |
| Others                                    | 404(4%)    | 64(3%)     | 86(3%)     | 254(5%)    |

MANUSCRIPT # 2019-216102 /supplemental tables

|                                    |           |          |          |           |
|------------------------------------|-----------|----------|----------|-----------|
| Any steroids use, %                | 3194(33%) | 623(33%) | 794(30%) | 1777(34%) |
| NSAIDs prescribed in past 6 months | 1176(12%) | 225(12%) | 224(9%)  | 727(14%)  |
| Phototherapy in past 6 months      | 248(3%)   | 36(2%)   | 88(3%)   | 124(2%)   |

MANUSCRIPT # 2019-216102 /supplemental tables

**Table S5.** Additional characteristics of psoriatic arthritis patients at the time of index date, overall and by drug class.

| <b>Variable</b>                 | <b>Overall<br/>(n=5520)</b> | <b>IL-17<br/>(n = 944)</b> | <b>IL-12/23<br/>(n = 889)</b> | <b>TNF<br/>(n = 3687)</b> |
|---------------------------------|-----------------------------|----------------------------|-------------------------------|---------------------------|
| Age                             | 47(11)                      | 49(10)                     | 48 (11)                       | 46(11)                    |
| Male                            | 2626(48%)                   | 440(47%)                   | 417(47%)                      | 1769(48%)                 |
| Geographic area                 |                             |                            |                               |                           |
| Metropolitan area               | 4925(89%)                   | 861(91%)                   | 806(91%)                      | 3258(88%)                 |
| Micropolitan area core          | 331(6%)                     | 46(5%)                     | 45(5%)                        | 240(6%)                   |
| Small town core                 | 172(3%)                     | 22(2%)                     | 28(3%)                        | 122(3%)                   |
| Rural areas                     | 92(2%)                      | *                          | *                             | 67(1%)                    |
| Health plan                     |                             |                            |                               |                           |
| Exclusive Provider Organization | 606(11%)                    | 103(11%)                   | 100(11%)                      | 403(11%)                  |
| HMO                             | 516(9%)                     | 89(9%)                     | 80(9%)                        | 347(9%)                   |
| Other                           | 99(2%)                      | *                          | *                             | 73(2%)                    |
| Point-of-Service                | 4299(78%)                   | 739(78%)                   | 696(78%)                      | 2864(78%)                 |
| Race                            |                             |                            |                               |                           |
| Asian                           | 175(3%)                     | 41(4%)                     | 26(3%)                        | 108(3%)                   |
| Black                           | 322(6%)                     | 47(5%)                     | 46(5%)                        | 229(6%)                   |
| Hispanic                        | 536(10%)                    | 99(11%)                    | 98(11%)                       | 339(9%)                   |
| White                           | 4487(81%)                   | 757(80%)                   | 719(81%)                      | 3011(82%)                 |
| Education level                 |                             |                            |                               |                           |
| Bachelor Degree Plus            | 1137(21%)                   | 200(21%)                   | 204(23%)                      | 733(20%)                  |
| high school or lower            | 1239(22%)                   | 204(22%)                   | 194(22%)                      | 841(23%)                  |
| less than bachelor              | 3144(57%)                   | 540(57%)                   | 491(55%)                      | 2113(57%)                 |
| Household Income                |                             |                            |                               |                           |
| <\$40,000                       | 639(12%)                    | 115(12%)                   | 95(11%)                       | 429(12%)                  |
| \$40,000-\$74,999               | 1326(24%)                   | 197(21%)                   | 215(24%)                      | 914(25%)                  |
| \$75,000-\$124,999              | 1769(32%)                   | 314(33%)                   | 261(29%)                      | 1194(32%)                 |
| \$125,000-\$199,999             | 1036(19%)                   | 184(19%)                   | 175(19%)                      | 677(18%)                  |
| \$200,000+                      | 750(14%)                    | 134(14%)                   | 143(16%)                      | 473(13%)                  |
| Psoriasis                       | 3648 (66%)                  | 699 (74%)                  | 650 (73%)                     | 2299 (62%)                |

## MANUSCRIPT # 2019-216102 /supplemental tables

|                                     |           |          |          |           |
|-------------------------------------|-----------|----------|----------|-----------|
| Charlson Comorbidity Index score    |           |          |          |           |
| 0                                   | 3656(66%) | 569(60%) | 577(65%) | 2510(68%) |
| 1                                   | 1216(22%) | 240(25%) | 199(22%) | 777(21%)  |
| >=2                                 | 648(12%)  | 135(14%) | 113(13%) | 400(11%)  |
| Ankylosing spondylitis              | 169(3%)   | 27(3%)   | 16(1%)   | 126(3%)   |
| Chronic pulmonary disease           | 449(8%)   | 80(9%)   | 72(8%)   | 297(8%)   |
| Peripheral vascular disorders       | 71(1%)    | *        | *        | 46(1%)    |
| Cardiac arrhythmias                 | 206(4%)   | 39(4%)   | 35(4%)   | 132(4%)   |
| Congestive heart failure            | 54(1%)    | *        | *        | 33(1%)    |
| Depression                          | 686(12%)  | 122(13%) | 102(12%) | 462(13%)  |
| Diabetes, uncomplected              | 627(11%)  | 145(15%) | 106(12%) | 376(10%)  |
| Diabetes, complicated               | 312(6%)   | 83(9%)   | 60(7%)   | 169(5%)   |
| Hypertension                        | 1514(27%) | 297(31%) | 239(27%) | 978(26%)  |
| Liver disease                       | 243(4%)   | 47(5%)   | 42(5%)   | 154(4%)   |
| Obesity                             | 700(13%)  | 146(15%) | 112(13%) | 442(12%)  |
| Renal failure                       | 87(2%)    | 21(2%)   | 12 (1%)  | 54(1%)    |
| Emergency room visits               |           |          |          |           |
| 0                                   | 4810(87%) | 821(87%) | 776(87%) | 3213(87%) |
| 1                                   | 507(9%)   | 93(10%)  | 82(9%)   | 332(9%)   |
| >=2                                 | 203(4%)   | 30(3%)   | 31(3%)   | 142(4%)   |
| Hospitalized                        | 177 (3%)  | 24 (3%)  | 28 (3%)  | 125 (3%)  |
| Physician office visits             | 5 (4)     | 5(4)     | 5 (4)    | 5 (3)     |
| Specialists physician office visits | 2 (2)     | 2 (2)    | 2 (2)    | 2 (1)     |
| Number of previous biologics        |           |          |          |           |
| 0                                   | 2689(49%) | 133(14%) | 312(35%) | 2244(61%) |
| 1                                   | 1726(31%) | 320(34%) | 371(42%) | 1035(28%) |
| >=2                                 | 1105(20%) | 491(52%) | 206(23%) | 408(11%)  |
| DMARDs in past 6 mos                | 2064(37%) | 331(35%) | 287(32%) | 1446(39%) |
| Methotrexate                        | 1435(26%) | 174(18%) | 183(21%) | 1078(29%) |
| Sulfasalazine                       | 237(4%)   | 21(2%)   | 27(3%)   | 189(5%)   |
| Apremilast                          | 401(7%)   | 125(13%) | 95(11%)  | 181(5%)   |

MANUSCRIPT # 2019-216102 /supplemental tables

|                                    |           |          |          |           |
|------------------------------------|-----------|----------|----------|-----------|
| others                             | 254(5%)   | 59(6%)   | 33(4%)   | 162(4%)   |
| Any steroids use, %                | 2184(40%) | 379(40%) | 333(37%) | 1472(40%) |
| NSAIDs prescribed in past 6 months | 1132(21%) | 180(19%) | 139(16%) | 813(22%)  |
| Phototherapy in past 6 months      | 56(1%)    | *        | *        | 28(1%)    |

MANUSCRIPT # 2019-216102 /supplemental tables

**Table S6.** Hazard ratios (95% confidence intervals), from sensitivity analysis to restrict to serious infections listed as primary diagnosis on hospital admissions claims.

|                             |                         |
|-----------------------------|-------------------------|
| <b>Total cohort</b>         |                         |
| IL-17 vs. TNF               | 0.78 (0.39-1.60)        |
| IL-12/23 vs. TNF            | <b>0.45 (0.27-0.75)</b> |
| IL-17 vs. IL-12/23          | 1.22 (0.59-2.53)        |
| <b>Psoriasis</b>            |                         |
| IL-17 vs. TNF               | 0.62 (0.27-1.39)        |
| IL-12/23 vs. TNF            | <b>0.44 (0.26-0.76)</b> |
| IL-17 vs. IL-12/23          | 1.03 (0.47-2.25)        |
| <b>Psoriatic arthritis</b>  |                         |
| IL-17 vs. TNF               | 0.65 (0.22-1.86)        |
| IL-12/23 vs. TNF            | 0.43 (0.18-1.02)        |
| IL-17 vs. IL-12/23          | 1.03 (0.47-2.25)        |
| <b>Biologic-naïve</b>       |                         |
| IL-17 vs. TNF               | 1.87 (0.77-4.53)        |
| IL-12/23 vs. TNF            | <b>0.35 (0.16-0.80)</b> |
| IL-17 vs. IL-12/23          | 3.51 (0.87-14.25)       |
| <b>Biologic experienced</b> |                         |
| IL-17 vs. TNF               | 0.64 (0.32-1.26)        |
| IL-12/23 vs. TNF            | 0.55 (0.29-1.05)        |
| IL-17 vs. IL-12/23          | 0.99 (0.46-2.14)        |

MANUSCRIPT # 2019-216102 /supplemental tables

**Table S7.** Hazard ratios (95% confidence intervals), from sensitivity analysis to narrow permissible prescription gap to 60 days.

|                              |                         |
|------------------------------|-------------------------|
| <b>Total cohort</b>          |                         |
| IL-17 vs. TNF                | 0.84 (0.45-1.57)        |
| IL-12/23 vs. TNF             | 0.65 (0.42-1.00)        |
| IL-17 vs. IL-12/23           | 1.09 (0.59-2.04)        |
| <b>Psoriasis</b>             |                         |
| IL-17 vs. TNF                | 0.70 (0.34-1.44)        |
| IL-12/23 vs. TNF             | <b>0.62 (0.39-0.98)</b> |
| IL-17 vs. IL-12/23           | 1.07 (0.53-2.13)        |
| <b>Psoriatic arthritis</b>   |                         |
| IL-17 vs. TNF                | 0.65 (0.25-1.69)        |
| IL-12/23 vs. TNF             | 0.72 (0.37-1.39)        |
| IL-17 vs. IL-12/23           | 1.07 (0.53-2.13)        |
| <b>Biologics-naïve</b>       |                         |
| IL-17 vs. TNF                | 1.62 (0.71-3.67)        |
| IL-12/23 vs. TNF             | <b>0.45 (0.22-0.92)</b> |
| IL-17 vs. IL-12/23           | 3.06 (0.93-10.00)       |
| <b>Biologics experienced</b> |                         |
| IL-17 vs. TNF                | 0.73 (0.40-1.35)        |
| IL-12/23 vs. TNF             | 0.83 (0.48-1.45)        |
| IL-17 vs. IL-12/23           | 0.81 (0.42-1.55)        |
